# Supplementary material for: Closing and coupling: metal linked biliazine dimers
Source: Royal Society of Chemistry journal article supplement (doi:10.1039/d6ra01668e), 2026-05-11
Supplement: d6ra01668e1.pdf [file d6ra01668e1.pdf]

## **Closing and Coupling: Metal Linked Biliazine Dimers**

Towhidi Illius Jeyadi,<sup>a</sup> Wei-Yuan Chen,<sup>b</sup> Michael D. Tedesco,<sup>a</sup> Briana R. Schrage,<sup>a</sup>  
Victor N. Nemykin<sup>b</sup> and Christopher J. Ziegler\*<sup>a</sup>

<sup>a</sup>Department of Chemistry, University of Akron, Akron, OH 44325, USA

<sup>b</sup> Department of Chemistry, University of Tennessee, Knoxville, TN 37996, USA

Email: [ziegler@uakron.edu](mailto:ziegler@uakron.edu)

## **Supporting Information**

## Table of Contents

|                                                                                                                               |     |
|-------------------------------------------------------------------------------------------------------------------------------|-----|
| <b>Figure S1:</b> Mass spectra of <b>Biliazine-dimer(Py)</b> .....                                                            | S3  |
| <b>Figure S2:</b> Mass spectra of <b>Biliazine-dimer(In)</b> .....                                                            | S4  |
| <b>Figure S3:</b> Orbital composition chart for compound <b>1</b> .....                                                       | S5  |
| <b>Figure S4:</b> Orbital composition chart for compound <b>2</b> .....                                                       | S5  |
| <b>Figure S5:</b> Frontier orbital structures for compound <b>1</b> . From left to right:<br>LUMO+1, LUMO, HOMO, HOMO-1 ..... | S6  |
| <b>Figure S6:</b> Frontier orbital structures for compound <b>2</b> . From left to right:<br>LUMO+1, LUMO, HOMO, HOMO-1 ..... | S6  |
| <b>Table S1:</b> X-ray crystal data and structure parameters.....                                                             | S7  |
| <b>Table S2:</b> B3LYP TDDFT-predicted energies and expansion coefficients for compound <b>1</b> .....                        | S8  |
| <b>Table S3:</b> B3LYP TDDFT-predicted energies and expansion coefficients for compound <b>2</b> .....                        | S12 |

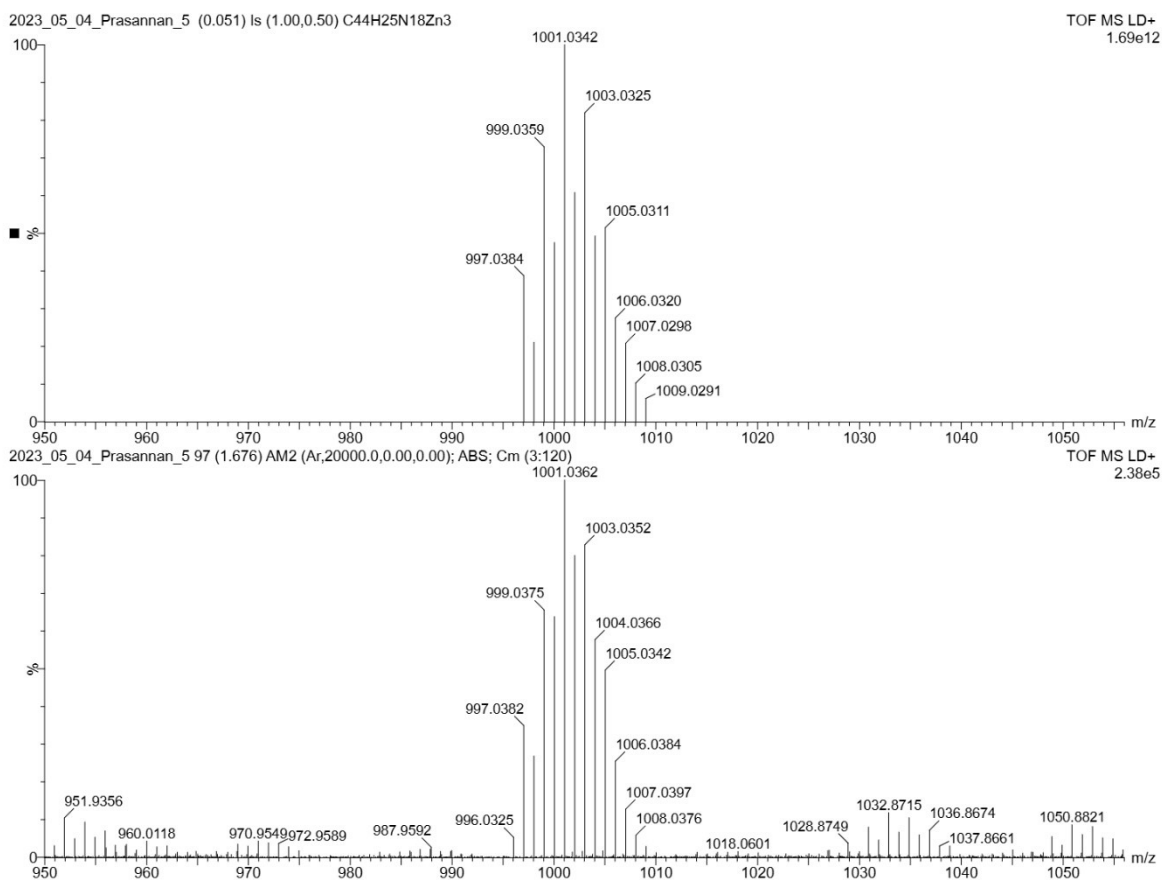

**Figure S1:** Mass spectra of **1**. Top: calculated spectrum. Bottom: experimental spectrum.

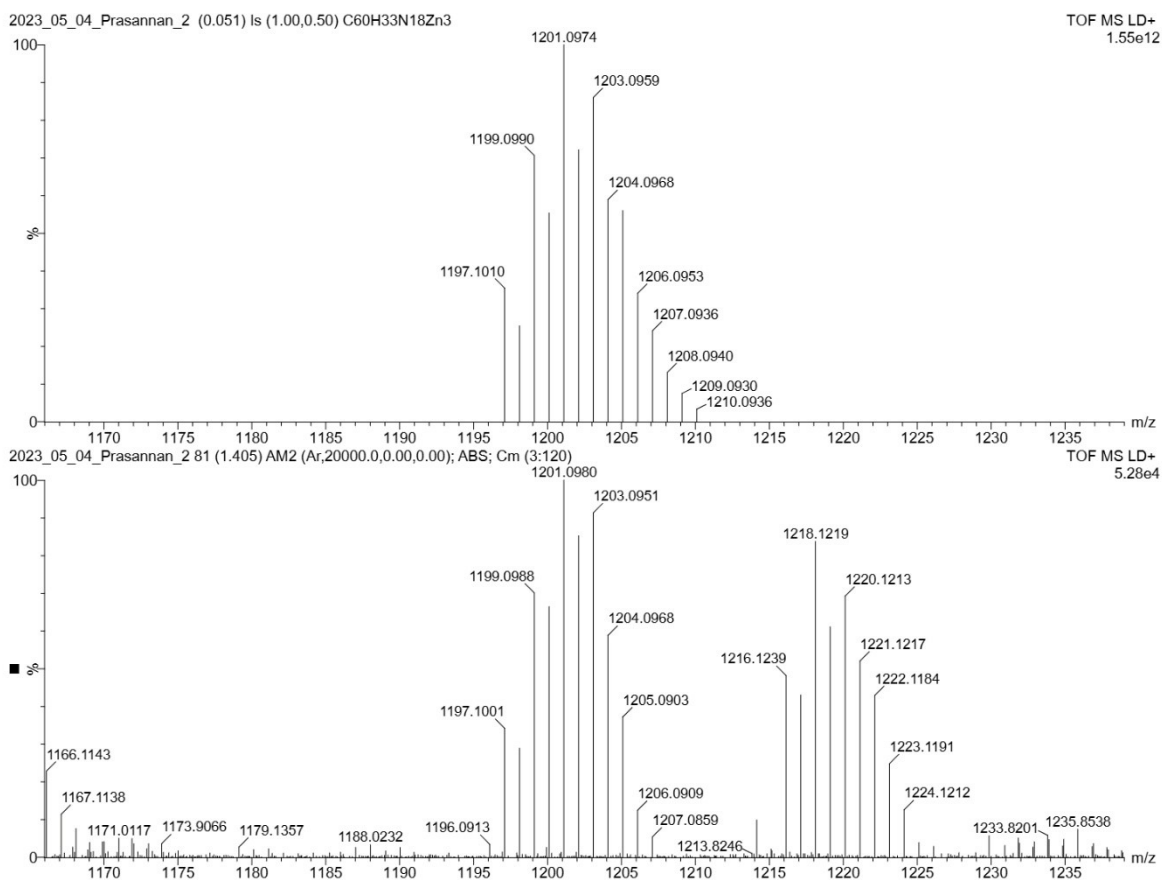

**Figure S2:** Mass spectra of **2**. Top: calculated spectrum. Bottom: experimental spectrum.

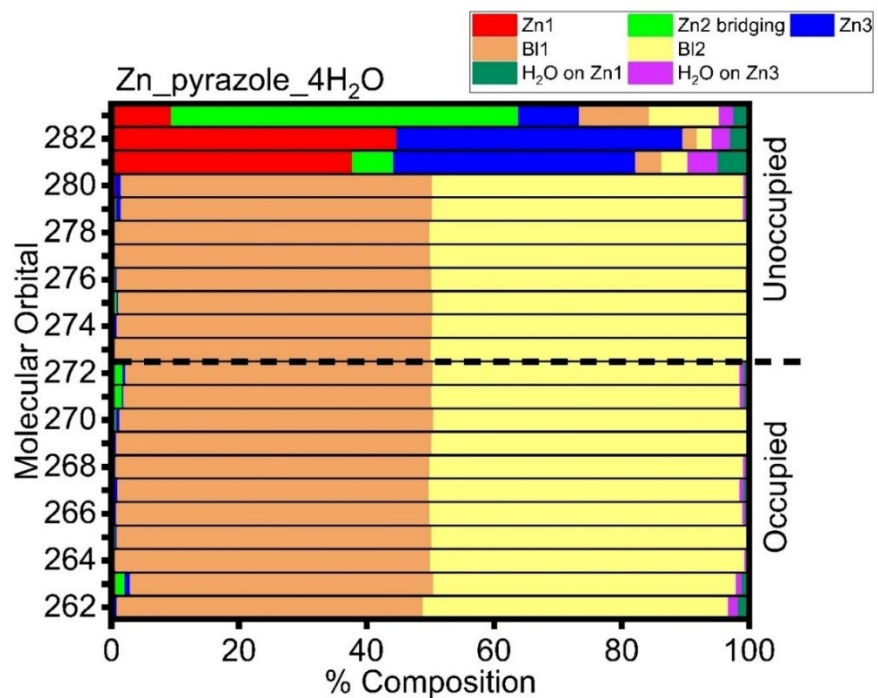

**Figure S3:** Orbital composition chart for compound 1.

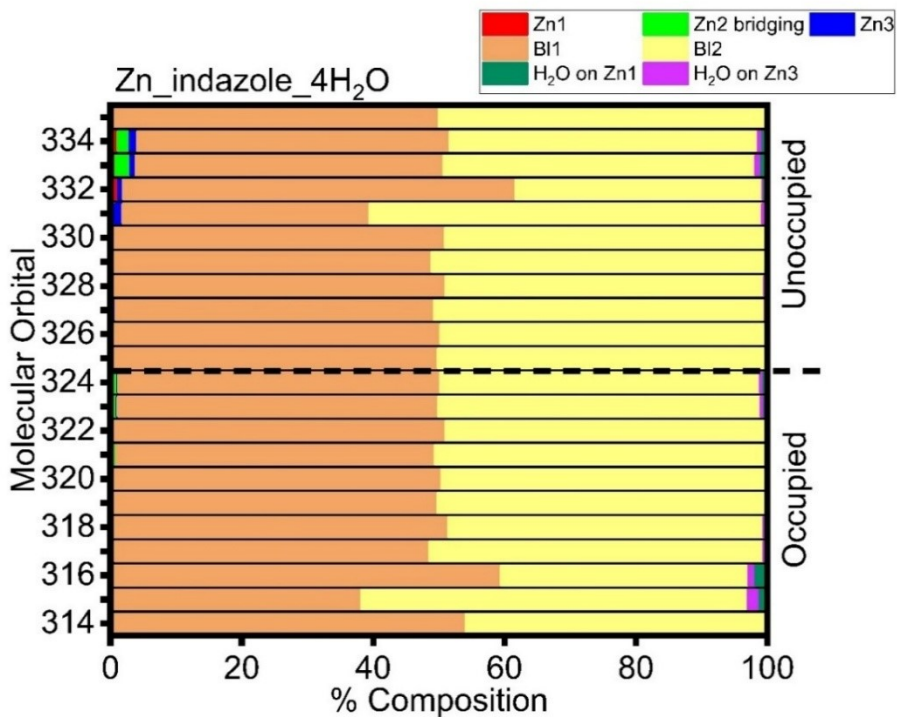

**Figure S4:** Orbital composition chart for compound 2.

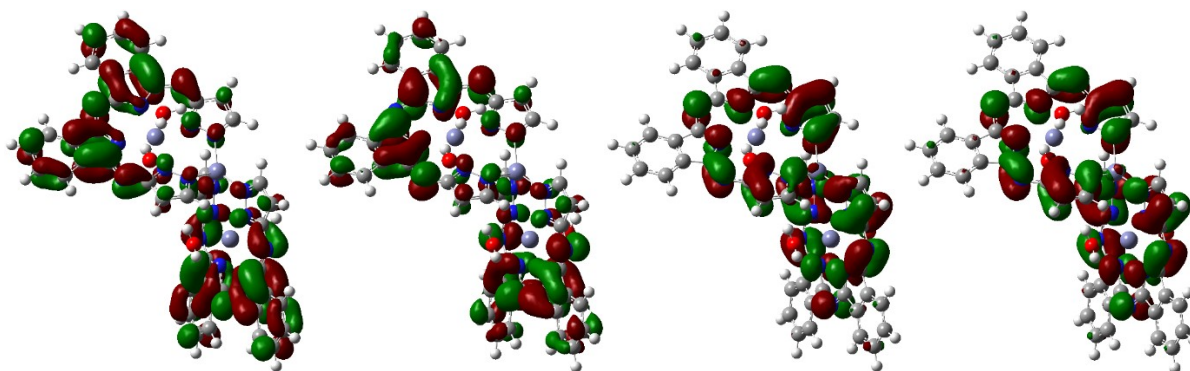

**Figure S5:** Frontier orbital structures for compound 1. From left to right: LUMO+1, LUMO, HOMO, HOMO-1.

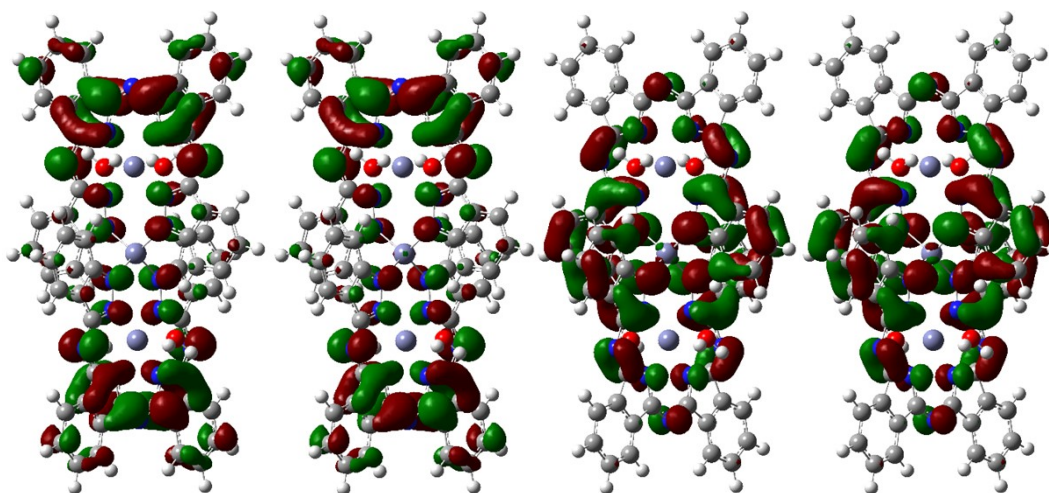

**Figure S6:** Frontier orbital structures for compound 2. From left to right: LUMO+1, LUMO, HOMO, HOMO-1.

| Compound                                        | 1a                      | 1b                     | 2                      |
|-------------------------------------------------|-------------------------|------------------------|------------------------|
| <b>CCDC number</b>                              | 2531176                 | 2531175                | 2531177                |
| <b>Empirical formula</b>                        | C53 H47 N21 O4 Zn3      | C56 H52 N22 O4 Zn3     | C72 H64 N22 O6 Zn3     |
| <b>Formula weight</b>                           | 1238.22                 | 1293.30                | 1529.56                |
| <b>Temperature (K)</b>                          | 100(2)                  | 100(2)                 | 100(2)                 |
| <b>Wavelength (Å)</b>                           | 0.71073                 | 0.71073                | 1.54178                |
| <b>Crystal system</b>                           | Triclinic               | Monoclinic             | Monoclinic             |
| <b>Space group</b>                              | P-1                     | C2/c                   | C2/c                   |
| <b>a/ Å</b>                                     | 11.064(2)               | 29.964(4)              | 25.5950(13)            |
| <b>b/ Å</b>                                     | 13.595(3)               | 11.8314(15)            | 17.0614(8)             |
| <b>c/ Å</b>                                     | 17.394(4)               | 16.308(2)              | 20.0999(10)            |
| <b><math>\alpha</math>(°)</b>                   | 91.281(8)               | 90                     | 90                     |
| <b><math>\beta</math>(°)</b>                    | 92.138(7)               | 102.336(6)             | 124.932(2)             |
| <b><math>\gamma</math>(°)</b>                   | 92.972(7)               | 90                     | 90                     |
| <b>Volume (Å<sup>3</sup>)</b>                   | 2610.1(10)              | 5648.0(13)             | 7196.0(6)              |
| <b>Z</b>                                        | 2                       | 4                      | 4                      |
| <b>Dc (mg/m<sup>3</sup>)</b>                    | 1.575                   | 1.521                  | 1.412                  |
| <b>Abs. Coef. (mm<sup>-1</sup>)</b>             | 1.438                   | 1.333                  | 1.724                  |
| <b>F(000)</b>                                   | 1268                    | 2656                   | 3152                   |
| <b>Reflns collected</b>                         | 116814                  | 54145                  | 88274                  |
| <b>Indep. reflns</b>                            | 13280 [R(int) = 0.0872] | 5050 [R(int) = 0.1283] | 6383 [R(int) = 0.1461] |
| <b>Data/restraints/parameters</b>               | 13280 / 0 / 737         | 5050 / 0 / 388         | 6383 / 147 / 504       |
| <b>GOF on F<sup>2</sup></b>                     | 1.029                   | 1.101                  | 1.084                  |
| <b>Final R1 (I&gt;2<math>\sigma</math>(I))</b>  | 0.0387                  | 0.0737                 | 0.0808                 |
| <b>Final wR2 (I&gt;2<math>\sigma</math>(I))</b> | 0.0982                  | 0.1587                 | 0.1803                 |
| <b>R1 (all data)</b>                            | 0.0506                  | 0.0952                 | 0.1013                 |
| <b>wR2 (all data)</b>                           | 0.1079                  | 0.1665                 | 0.1918                 |

**Table S1:** X-ray data collection and structure parameters.

**Table S2:** B3LYP TDDFT-predicted energies and expansion coefficients for compound **1**.

| Index | Energy.cm <sup>-1</sup> | Wavelength<br>h | Osc.Strength | Contributions Zn_pyrazole_4H <sub>2</sub> O/B3LYP/ 6-311+G for Zn, 6-311G(d) for C, N, O, H                                                                                                                                          |
|-------|-------------------------|-----------------|--------------|--------------------------------------------------------------------------------------------------------------------------------------------------------------------------------------------------------------------------------------|
| 0     | 18799.171               | <b>531.938</b>  | 1.95E-01     | <b>53.7% HOMO =&gt; LUMO, 45.6% H-1 =&gt; L+1</b>                                                                                                                                                                                    |
| 1     | 18920.96                | <b>528.514</b>  | 3.81E-01     | <b>54.6% H-1 =&gt; LUMO, 44.8% HOMO =&gt; L+1</b>                                                                                                                                                                                    |
| 2     | 19919.475               | 502.021         | 2.00E-04     | 53.9% H-1 => L+1, 45.6% HOMO => LUMO                                                                                                                                                                                                 |
| 3     | 19921.088               | 501.981         | 1.48E-02     | 54.6% HOMO => L+1, 44.8% H-1 => LUMO                                                                                                                                                                                                 |
| 4     | 22303.65                | <b>448.357</b>  | 1.06E+00     | <b>62.1% H-2 =&gt; LUMO, 36.4% H-3 =&gt; L+1</b>                                                                                                                                                                                     |
| 5     | 22549.649               | <b>443.466</b>  | 4.01E-01     | <b>55.1% H-2 =&gt; L+1, 42.6% H-3 =&gt; LUMO</b>                                                                                                                                                                                     |
| 6     | 23201.345               | 431.01          | 1.60E-03     | 56.0% H-3 => LUMO, 43.4% H-2 => L+1                                                                                                                                                                                                  |
| 7     | 23217.476               | 430.71          | 2.52E-02     | 62.7% H-3 => L+1, 36.7% H-2 => LUMO                                                                                                                                                                                                  |
| 8     | 26534.834               | 376.863         | 1.33E-02     | 21.8% H-5 => L+1, 12.7% H-4 => LUMO, 10.8% H-8 => LUMO, 9.91% H-6 => LUMO, 8.11% H-16 => LUMO, 7.37% H-10 => L+1, 6.26% H-12 => L+1, 5.45% H-11 => LUMO, 4.64% H-7 => L+1, 3.11% H-17 => L+1, 2.65% H-14 => L+1, 2.05% H-18 => L+1   |
| 9     | 26536.447               | 376.84          | 2.36E-02     | 23.8% H-5 => LUMO, 11.6% H-4 => L+1, 10.4% H-6 => L+1, 10.1% H-8 => L+1, 7.74% H-16 => L+1, 7.72% H-10 => LUMO, 6.35% H-12 => LUMO, 5.25% H-11 => L+1, 4.11% H-7 => LUMO, 3.19% H-17 => LUMO, 2.66% H-14 => LUMO, 2.04% H-18 => LUMO |
| 10    | 26657.43                | 375.13          | 6.71E-02     | 35.7% H-7 => L+1, 30.5% H-6 => LUMO, 9.79% H-8 => LUMO, 7.00% H-4 => LUMO, 3.66% H-5 => L+1, 3.20% H-15 => LUMO, 2.94% H-17 => L+1                                                                                                   |
| 11    | 26664.689               | 375.028         | 3.50E-03     | 38.7% H-7 => LUMO, 28.3% H-6 => L+1, 9.97% H-8 => L+1, 7.05% H-4 => L+1, 3.75% H-5 => LUMO, 2.64% H-15 => L+1, 2.53% H-17 => LUMO                                                                                                    |
| 12    | 26927.626               | 371.366         | 1.40E-03     | 42.6% H-15 => LUMO, 35.3% H-17 => L+1, 5.06% H-5 => L+1, 4.76% H-6 => LUMO, 3.73% H-13 => LUMO                                                                                                                                       |
| 13    | 26930.852               | 371.321         | 9.00E-04     | 42.0% H-15 => L+1, 36.8% H-17 => LUMO, 5.26% H-5 => LUMO, 3.97% H-6 => L+1, 3.73% H-13 => L+1                                                                                                                                        |
| 14    | 27111.521               | 368.847         | 9.00E-03     | 26.2% H-16 => L+1, 13.0% H-12 => LUMO, 12.9% H-14 => LUMO, 9.52% H-8 => L+1, 8.87% H-5 => LUMO, 7.58% H-9 => LUMO, 7.43% H-18 => LUMO, 5.41% H-11 => L+1, 2.07% H-6 => L+1                                                           |
| 15    | 27113.94                | 368.814         | 1.17E-02     | 27.0% H-16 => LUMO, 12.6% H-12 => L+1, 12.5% H-14 => L+1, 9.81% H-8 => LUMO, 8.62% H-5 => L+1, 7.27% H-18 => L+1, 7.20% H-9 => L+1, 5.56%                                                                                            |

|    |           |                |          |                                                                                                                                                                                                 |
|----|-----------|----------------|----------|-------------------------------------------------------------------------------------------------------------------------------------------------------------------------------------------------|
|    |           |                |          | H-11 => LUMO, 2.45% H-6 => LUMO                                                                                                                                                                 |
| 16 | 27589.807 | 362.453        | 3.00E-04 | 46.0% H-4 => LUMO, 20.6% H-8 => LUMO, 12.0% H-9 => L+1, 8.37% H-10 => L+1, 7.63% H-5 => L+1                                                                                                     |
| 17 | 27613.197 | 362.146        | 6.30E-03 | 42.8% H-4 => L+1, 19.9% H-8 => L+1, 12.9% H-9 => LUMO, 9.91% H-10 => LUMO, 9.06% H-5 => LUMO                                                                                                    |
| 18 | 28190.69  | 354.727        | 1.70E-03 | 26.7% H-10 => LUMO, 14.7% H-5 => LUMO, 10.5% H-19 => L+1, 10.2% H-9 => LUMO, 7.35% H-18 => LUMO, 6.84% H-14 => LUMO, 5.41% H-12 => LUMO, 4.51% H-4 => L+1, 4.42% H-16 => L+1, 2.53% H-11 => L+1 |
| 19 | 28207.628 | 354.514        | 2.52E-02 | 24.6% H-10 => L+1, 14.7% H-5 => L+1, 12.7% H-19 => LUMO, 9.01% H-18 => L+1, 7.92% H-9 => L+1, 6.85% H-14 => L+1, 5.49% H-12 => L+1, 4.08% H-16 => LUMO, 3.32% H-4 => LUMO, 2.27% H-11 => LUMO   |
| 20 | 28437.496 | 351.648        | 1.31E-01 | 25.0% H-18 => L+1, 19.4% H-19 => LUMO, 12.0% H-11 => LUMO, 8.41% H-10 => L+1, 8.18% H-5 => L+1, 5.43% H-1 => L+3, 5.03% H-9 => L+1, 3.39% H-4 => LUMO, 3.14% HOMO => L+2                        |
| 21 | 28452.014 | 351.469        | 5.40E-03 | 30.6% H-18 => LUMO, 23.0% H-19 => L+1, 10.4% H-11 => L+1, 6.58% H-10 => LUMO, 6.23% H-5 => LUMO, 4.31% H-9 => LUMO, 3.45% H-4 => L+1, 3.01% H-12 => LUMO, 2.71% H-1 => L+2                      |
| 22 | 28932.72  | 345.629        | 2.00E-04 | 46.2% H-9 => LUMO, 24.2% H-4 => L+1, 15.0% H-7 => LUMO, 9.28% H-5 => LUMO, 2.07% H-11 => L+1                                                                                                    |
| 23 | 28948.045 | 345.446        | 3.06E-01 | 39.9% H-9 => L+1, 19.2% H-4 => LUMO, 11.0% H-7 => L+1, 7.78% H-5 => L+1, 7.17% H-1 => L+3, 7.05% HOMO => L+2, 2.92% H-11 => LUMO, 2.22% H-14 => L+1                                             |
| 24 | 28994.825 | <b>344.889</b> | 4.56E-01 | <b>40.6% H-13 =&gt; LUMO, 26.2% H-12 =&gt; L+1, 18.6% H-14 =&gt; L+1, 5.00% H-15 =&gt; LUMO</b>                                                                                                 |
| 25 | 28994.825 | 344.889        | 2.92E-01 | 40.0% H-13 => L+1, 26.3% H-12 => LUMO, 21.3% H-14 => LUMO, 4.89% H-15 => L+1                                                                                                                    |
| 26 | 29048.058 | <b>344.257</b> | 9.98E-01 | <b>38.6% HOMO =&gt; L+2, 30.3% H-1 =&gt; L+3, 8.09% H-9 =&gt; L+1, 5.37% H-18 =&gt; L+1, 5.29% H-7 =&gt; L+1, 4.19% H-19 =&gt; LUMO, 2.15% H-5 =&gt; L+1, 2.10% H-4 =&gt; LUMO</b>              |
| 27 | 29259.375 | 341.771        | 6.30E-03 | 32.7% H-6 => LUMO, 29.1% H-11 => LUMO, 18.3% H-5 => L+1, 4.21% H-16 => LUMO, 3.32% H-10 => L+1, 2.49% H-8 => LUMO, 2.38% H-7 => L+1, 2.17% H-4 => LUMO                                          |
| 28 | 29279.539 | 341.535        | 5.56E-02 | 33.1% H-6 => L+1, 27.8% H-11 => L+1, 16.3% H-5 => LUMO, 4.18% H-16 =>                                                                                                                           |

|    |           |                |          |                                                                                                                                      |
|----|-----------|----------------|----------|--------------------------------------------------------------------------------------------------------------------------------------|
|    |           |                |          | L+1, 3.95% H-1 => L+2, 3.49% H-10 => LUMO, 2.90% HOMO => L+3                                                                         |
| 29 | 29331.965 | <b>340.925</b> | 4.92E-01 | <b>42.0% H-1 =&gt; L+2, 40.4% HOMO =&gt; L+3, 2.87% H-18 =&gt; LUMO, 2.33% H-19 =&gt; L+1, 2.07% H-6 =&gt; L+1</b>                   |
| 30 | 29940.107 | 334            | 4.10E-03 | 51.6% H-1 => L+3, 46.5% HOMO => L+2                                                                                                  |
| 31 | 29950.592 | 333.883        | 1.00E-04 | 51.5% HOMO => L+3, 46.7% H-1 => L+2                                                                                                  |
| 32 | 30153.037 | 331.642        | 0.00E+00 | 34.3% H-7 => L+1, 31.4% H-8 => LUMO, 12.8% H-9 => L+1, 10.2% H-6 => LUMO, 6.07% H-11 => LUMO, 2.12% H-10 => L+1                      |
| 33 | 30155.457 | 331.615        | 0.00E+00 | 33.3% H-8 => L+1, 32.7% H-7 => LUMO, 12.2% H-9 => LUMO, 10.3% H-6 => L+1, 6.44% H-11 => L+1                                          |
| 34 | 30551.475 | 327.316        | 0.00E+00 | 36.7% H-10 => L+1, 31.7% H-11 => LUMO, 12.4% H-8 => LUMO, 4.93% H-6 => LUMO, 4.61% H-14 => L+1, 3.24% H-9 => L+1, 2.91% H-12 => L+1  |
| 35 | 30554.701 | 327.282        | 3.00E-04 | 34.9% H-10 => LUMO, 34.0% H-11 => L+1, 12.2% H-8 => L+1, 5.04% H-6 => L+1, 4.56% H-14 => LUMO, 3.06% H-9 => LUMO, 2.90% H-12 => LUMO |
| 36 | 31263.663 | 319.86         | 2.00E-04 | 47.9% H-16 => LUMO, 18.9% H-12 => L+1, 17.0% H-14 => L+1, 7.29% H-19 => LUMO, 3.38% H-10 => L+1                                      |
| 37 | 31277.374 | 319.72         | 1.00E-04 | 49.2% H-16 => L+1, 18.0% H-12 => LUMO, 16.7% H-14 => LUMO, 7.17% H-19 => L+1, 3.28% H-10 => LUMO                                     |
| 38 | 31629.838 | 316.157        | 7.65E-02 | 51.5% H-2 => L+2, 40.1% H-3 => L+3                                                                                                   |
| 39 | 31661.294 | 315.843        | 1.46E-01 | 48.4% H-2 => L+3, 41.8% H-3 => L+2                                                                                                   |
| 40 | 31870.998 | 313.765        | 1.43E-02 | 29.7% H-17 => L+1, 24.4% H-13 => LUMO, 20.3% H-15 => LUMO, 10.8% H-14 => L+1, 6.91% H-12 => L+1                                      |
| 41 | 31872.611 | 313.749        | 4.00E-03 | 30.1% H-17 => LUMO, 25.1% H-13 => L+1, 21.5% H-15 => L+1, 10.2% H-14 => LUMO, 6.55% H-12 => LUMO                                     |
| 42 | 31991.981 | 312.578        | 2.70E-03 | 25.7% H-13 => L+1, 21.9% H-15 => L+1, 16.3% H-14 => LUMO, 16.2% H-17 => LUMO, 15.5% H-12 => LUMO                                     |
| 43 | 31993.595 | 312.563        | 4.50E-03 | 24.2% H-13 => LUMO, 21.1% H-15 => LUMO, 17.0% H-14 => L+1, 16.7% H-17 => L+1, 16.1% H-12 => L+1                                      |
| 44 | 32519.468 | 307.508        | 3.43E-02 | 48.7% H-20 => LUMO, 41.6% H-21 => L+1, 2.31% H-18 => L+1                                                                             |
| 45 | 32566.248 | 307.066        | 1.42E-02 | 44.3% H-20 => L+1, 42.5% H-21 => LUMO, 3.67% H-18 => LUMO                                                                            |
| 46 | 32706.589 | 305.749        | 1.39E-02 | 47.4% H-19 => LUMO, 43.1% H-18 => L+1, 3.25% H-16 => LUMO                                                                            |
| 47 | 32713.848 | 305.681        | 1.38E-02 | 48.0% H-19 => L+1, 40.4% H-18 => LUMO, 3.21% H-16 => L+1, 2.97% H-21 => LUMO                                                         |

|    |           |         |          |                                                                                                                                                                           |
|----|-----------|---------|----------|---------------------------------------------------------------------------------------------------------------------------------------------------------------------------|
| 48 | 33164.712 | 301.525 | 1.27E-02 | 27.9% H-25 => L+1, 20.4% H-22 => LUMO, 20.1% H-24 => LUMO, 8.78% H-3 => L+2, 5.70% H-2 => L+3, 4.69% H-17 => L+1, 3.09% H-23 => L+1, 2.37% H-18 => L+2, 2.10% H-19 => L+3 |
| 49 | 33165.518 | 301.518 | 1.70E-03 | 26.6% H-25 => LUMO, 18.6% H-22 => L+1, 18.3% H-24 => L+1, 12.5% H-3 => L+3, 7.73% H-2 => L+2, 4.21% H-17 => LUMO, 2.99% H-23 => LUMO, 2.20% H-18 => L+3                   |
| 50 | 33238.108 | 300.859 | 6.00E-03 | 44.5% H-3 => L+2, 40.3% H-2 => L+3, 4.58% H-25 => L+1, 3.54% H-22 => LUMO, 3.32% H-24 => LUMO                                                                             |
| 51 | 33242.947 | 300.816 | 4.00E-04 | 43.2% H-3 => L+3, 35.8% H-2 => L+2, 6.52% H-25 => LUMO, 4.96% H-22 => L+1, 4.40% H-24 => L+1                                                                              |

**Table S3:** B3LYP TDDFT-predicted energies and expansion coefficients for compound **2**.

| Index | Energy.cm <sup>-1</sup> | Wavelength<br>h | Osc.Strength    | Contributions <b>Zn_indazole_4H<sub>2</sub>O</b> /B3LYP/ 6-311+G for Zn, 6-311G(d) for C,<br>N, O, H            |
|-------|-------------------------|-----------------|-----------------|-----------------------------------------------------------------------------------------------------------------|
| 0     | 15060.791               | <b>663.976</b>  | <b>2.31E-01</b> | <b>82.8% HOMO =&gt; LUMO, 17.0% H-1 =&gt; L+1</b>                                                               |
| 1     | 15180.161               | <b>658.755</b>  | <b>3.02E-01</b> | <b>62.1% H-1 =&gt; LUMO, 37.7% HOMO =&gt; L+1</b>                                                               |
| 2     | 15799.595               | 632.928         | 5.90E-03        | 62.1% HOMO => L+1, 37.7% H-1 => LUMO                                                                            |
| 3     | 15893.155               | 629.202         | 4.05E-02        | 82.8% H-1 => L+1, 17.0% HOMO => LUMO                                                                            |
| 4     | 17436.094               | <b>573.523</b>  | <b>1.39E+00</b> | <b>82.0% H-2 =&gt; LUMO, 17.3% H-3 =&gt; L+1</b>                                                                |
| 5     | 17644.991               | 566.733         | 0.00E+00        | 95.2% H-3 => LUMO, 3.71% H-2 => L+1                                                                             |
| 6     | 17902.282               | <b>558.588</b>  | <b>1.44E-01</b> | <b>82.2% H-3 =&gt; L+1, 17.5% H-2 =&gt; LUMO</b>                                                                |
| 7     | 17938.577               | 557.458         | 0.00E+00        | 95.2% H-2 => L+1, 4.01% H-3 => LUMO                                                                             |
| 8     | 24410.37                | <b>409.662</b>  | <b>1.95E+00</b> | <b>64.5% HOMO =&gt; L+2, 30.3% H-1 =&gt; L+3</b>                                                                |
| 9     | 24791.063               | 403.371         | 0.00E+00        | 58.8% HOMO => L+3, 29.4% H-1 => L+2, 4.62% H-5 => LUMO, 4.53% H-4<br>=> L+1                                     |
| 10    | 25109.652               | 398.253         | 5.35E-02        | 61.5% H-1 => L+3, 31.7% HOMO => L+2, 3.41% H-1 => L+2                                                           |
| 11    | 25114.492               | 398.176         | 2.80E-03        | 59.6% H-1 => L+2, 33.9% HOMO => L+3, 3.59% H-1 => L+3                                                           |
| 12    | 25361.297               | 394.302         | 5.42E-02        | 49.1% H-6 => LUMO, 31.5% H-7 => L+1, 4.35% H-8 => LUMO, 3.62% H-9<br>=> L+1, 3.26% H-2 => L+2, 2.91% H-3 => L+3 |
| 13    | 25365.33                | 394.239         | 6.22E-02        | 47.8% H-7 => LUMO, 32.7% H-6 => L+1, 4.21% H-9 => LUMO, 3.82% H-8<br>=> L+1, 3.19% H-3 => L+2, 3.01% H-2 => L+3 |
| 14    | 25630.687               | 390.157         | 5.80E-03        | 68.6% H-4 => LUMO, 24.1% H-5 => L+1, 3.21% H-1 => L+3                                                           |
| 15    | 25714.568               | 388.885         | 0.00E+00        | 50.6% H-5 => LUMO, 35.6% H-4 => L+1, 5.97% H-1 => L+2, 4.02% HOMO<br>=> L+3                                     |
| 16    | 26317.064               | 379.982         | 3.78E-02        | 37.7% H-2 => L+2, 28.7% H-3 => L+3, 15.4% H-6 => LUMO, 9.42% H-8 =><br>LUMO, 6.29% H-9 => L+1                   |
| 17    | 26330.776               | 379.784         | 5.68E-02        | 35.0% H-3 => L+2, 33.0% H-2 => L+3, 13.4% H-7 => LUMO, 9.28% H-9 =><br>LUMO, 6.10% H-8 => L+1                   |
| 18    | 26463.857               | 377.874         | 0.00E+00        | 56.2% H-4 => L+1, 43.0% H-5 => LUMO                                                                             |
| 19    | 26492.893               | 377.46          | 3.80E-03        | 56.8% H-5 => L+1, 27.9% H-4 => LUMO, 8.30% H-10 => LUMO, 5.56% H-11<br>=> L+1                                   |
| 20    | 26616.296               | 375.71          | 2.92E-02        | 39.8% H-7 => L+1, 31.0% H-6 => LUMO, 6.34% H-2 => L+2, 6.29% H-8 =>                                             |

|    |           |         |          |                                                                                                                                  |
|----|-----------|---------|----------|----------------------------------------------------------------------------------------------------------------------------------|
|    |           |         |          | LUMO, 5.21% H-3 => L+3, 3.13% H-13 => LUMO, 2.65% H-6 => L+1                                                                     |
| 21 | 26620.329 | 375.653 | 0.00E+00 | 48.8% H-11 => LUMO, 40.2% H-10 => L+1, 2.70% H-4 => L+1, 2.56% H-14 => L+1, 2.34% H-15 => LUMO                                   |
| 22 | 26620.329 | 375.653 | 2.33E-02 | 45.9% H-6 => L+1, 35.3% H-7 => LUMO, 3.95% H-9 => LUMO, 3.54% H-3 => L+2, 3.09% H-2 => L+3, 2.31% H-7 => L+1, 2.02% H-12 => LUMO |
| 23 | 26638.073 | 375.403 | 1.10E-02 | 40.8% H-10 => LUMO, 35.3% H-11 => L+1, 16.7% H-5 => L+1, 2.40% H-14 => LUMO                                                      |
| 24 | 26685.66  | 374.733 | 0.00E+00 | 57.0% H-18 => LUMO, 39.1% H-21 => L+1                                                                                            |
| 25 | 26716.309 | 374.303 | 8.21E-02 | 27.0% H-9 => LUMO, 22.0% H-8 => L+1, 15.8% H-6 => L+1, 8.84% H-3 => L+2, 8.69% H-13 => L+1, 8.66% H-12 => LUMO, 5.91% H-2 => L+3 |
| 26 | 26722.761 | 374.213 | 0.00E+00 | 51.7% H-18 => L+1, 44.5% H-21 => LUMO                                                                                            |
| 27 | 26733.247 | 374.066 | 4.60E-02 | 24.1% H-7 => L+1, 23.8% H-8 => LUMO, 21.3% H-9 => L+1, 8.21% H-12 => L+1, 7.24% H-13 => LUMO, 5.89% H-2 => L+2, 5.28% H-3 => L+3 |
| 28 | 27165.56  | 368.113 | 1.00E-04 | 44.2% H-2 => L+3, 40.1% H-3 => L+2, 7.65% H-3 => L+3, 7.30% H-2 => L+2                                                           |
| 29 | 27167.979 | 368.08  | 0.00E+00 | 47.8% H-3 => L+3, 36.7% H-2 => L+2, 7.80% H-2 => L+3, 7.10% H-3 => L+2                                                           |
| 30 | 27667.237 | 361.438 | 5.40E-03 | 36.8% H-20 => LUMO, 33.4% H-19 => L+1, 8.93% H-22 => LUMO, 7.55% H-23 => L+1, 4.62% H-19 => LUMO, 3.38% H-20 => L+1              |
| 31 | 27668.85  | 361.417 | 3.20E-03 | 37.6% H-19 => LUMO, 33.0% H-20 => L+1, 9.35% H-23 => LUMO, 7.04% H-22 => L+1, 4.65% H-20 => LUMO, 3.30% H-19 => L+1              |
| 32 | 28030.993 | 356.748 | 3.74E-01 | 37.8% H-12 => LUMO, 26.9% H-13 => L+1, 17.3% H-9 => LUMO, 4.72% H-17 => L+1, 4.57% H-16 => LUMO                                  |
| 33 | 28033.412 | 356.717 | 2.90E-01 | 37.8% H-13 => LUMO, 27.0% H-12 => L+1, 16.5% H-8 => LUMO, 5.01% H-16 => L+1, 4.36% H-17 => LUMO                                  |
| 34 | 28368.132 | 352.508 | 3.06E-02 | 48.1% H-8 => L+1, 21.2% H-9 => LUMO, 13.1% H-8 => LUMO, 10.6% H-9 => L+1, 2.08% H-13 => L+1                                      |
| 35 | 28370.552 | 352.478 | 2.87E-02 | 48.7% H-9 => L+1, 21.0% H-8 => LUMO, 13.0% H-9 => LUMO, 10.6% H-8 => L+1, 2.02% H-12 => L+1                                      |
| 36 | 28461.693 | 351.349 | 1.74E-02 | 39.8% H-23 => LUMO, 34.5% H-22 => L+1, 9.46% H-19 => LUMO, 7.11% H-20 => L+1                                                     |
| 37 | 28464.919 | 351.31  | 3.70E-03 | 40.8% H-22 => LUMO, 34.3% H-23 => L+1, 8.62% H-20 => LUMO, 8.23% H-19 => L+1                                                     |
| 38 | 28744.793 | 347.889 | 2.85E-01 | 58.3% H-14 => LUMO, 32.9% H-15 => L+1, 4.63% H-10 => LUMO                                                                        |

|    |           |         |          |                                                                                                                   |
|----|-----------|---------|----------|-------------------------------------------------------------------------------------------------------------------|
| 39 | 28791.573 | 347.324 | 0.00E+00 | 51.4% H-15 => LUMO, 40.3% H-14 => L+1, 2.62% H-11 => LUMO, 2.09% H-10 => L+1                                      |
| 40 | 29048.864 | 344.248 | 1.00E-01 | 46.2% H-17 => LUMO, 35.2% H-16 => L+1, 3.77% H-13 => LUMO, 3.61% H-9 => L+1, 3.07% H-12 => L+1, 3.04% H-17 => L+1 |
| 41 | 29050.477 | 344.228 | 1.26E-01 | 44.9% H-16 => LUMO, 35.9% H-17 => L+1, 3.77% H-12 => LUMO, 3.45% H-8 => L+1, 3.13% H-16 => L+1, 3.09% H-13 => L+1 |
| 42 | 29721.531 | 336.456 | 0.00E+00 | 47.7% H-10 => L+1, 38.0% H-11 => LUMO, 7.46% H-14 => L+1, 5.83% H-15 => LUMO                                      |
| 43 | 29736.049 | 336.292 | 3.20E-03 | 48.8% H-11 => L+1, 37.1% H-10 => LUMO, 10.5% H-15 => L+1, 2.42% H-14 => LUMO                                      |
| 44 | 30392.584 | 329.028 | 0.00E+00 | 47.2% H-14 => L+1, 37.7% H-15 => LUMO, 6.87% H-10 => L+1, 6.72% H-11 => LUMO                                      |
| 45 | 30403.876 | 328.905 | 4.00E-04 | 51.4% H-15 => L+1, 34.3% H-14 => LUMO, 6.73% H-11 => L+1, 5.88% H-10 => LUMO                                      |
| 46 | 30604.708 | 326.747 | 1.00E-04 | 47.4% H-12 => L+1, 37.3% H-13 => LUMO, 5.96% H-12 => LUMO, 5.53% H-13 => L+1                                      |
| 47 | 30607.127 | 326.721 | 4.00E-04 | 47.9% H-13 => L+1, 36.9% H-12 => LUMO, 5.83% H-13 => LUMO, 5.63% H-12 => L+1                                      |
| 48 | 30778.924 | 324.898 | 1.22E-01 | 60.7% HOMO => L+4, 34.0% H-1 => L+5                                                                               |
| 49 | 30795.055 | 324.727 | 8.62E-02 | 50.3% HOMO => L+5, 44.5% H-1 => L+4                                                                               |
| 50 | 31538.698 | 317.071 | 1.49E-02 | 44.5% H-19 => L+1, 39.2% H-20 => LUMO, 7.09% H-19 => LUMO, 6.96% H-20 => L+1                                      |
| 51 | 31542.731 | 317.03  | 1.57E-02 | 46.1% H-20 => L+1, 38.1% H-19 => LUMO, 7.08% H-20 => LUMO, 6.87% H-19 => L+1                                      |
| 52 | 31629.032 | 316.165 | 0.00E+00 | 47.9% H-21 => LUMO, 44.9% H-18 => L+1, 4.81% H-26 => L+1                                                          |
| 53 | 31644.356 | 316.012 | 0.00E+00 | 51.5% H-21 => L+1, 39.2% H-18 => LUMO, 6.48% H-26 => LUMO                                                         |
| 54 | 31781.471 | 314.649 | 4.00E-04 | 33.8% H-16 => LUMO, 33.7% H-17 => L+1, 18.9% H-16 => L+1, 10.2% H-17 => LUMO                                      |
| 55 | 31783.89  | 314.625 | 3.00E-04 | 33.2% H-17 => LUMO, 33.0% H-16 => L+1, 19.5% H-17 => L+1, 10.1% H-16 => LUMO                                      |
| 56 | 31804.861 | 314.417 | 4.00E-04 | 47.2% H-1 => L+4, 42.2% HOMO => L+5, 4.56% H-1 => L+10, 3.04% HOMO => L+11                                        |

|    |           |         |          |                                                                                                                                        |
|----|-----------|---------|----------|----------------------------------------------------------------------------------------------------------------------------------------|
| 57 | 31822.605 | 314.242 | 6.00E-04 | 58.4% H-1 => L+5, 31.9% HOMO => L+4, 5.10% HOMO => L+10, 2.79% H-1 => L+11                                                             |
| 58 | 32227.495 | 310.294 | 6.79E-02 | 39.6% HOMO => L+6, 31.9% H-1 => L+7, 12.2% H-3 => L+4, 11.4% H-2 => L+5                                                                |
| 59 | 32262.984 | 309.953 | 0.00E+00 | 41.4% HOMO => L+7, 33.5% H-1 => L+6, 11.8% H-2 => L+4, 9.62% H-3 => L+5                                                                |
| 60 | 32768.693 | 305.169 | 3.00E-03 | 45.7% HOMO => L+9, 36.9% H-1 => L+8, 3.46% H-3 => L+10, 3.05% H-2 => L+11                                                              |
| 61 | 32779.179 | 305.072 | 0.00E+00 | 58.3% HOMO => L+8, 27.0% H-1 => L+9, 3.58% H-2 => L+10, 2.38% H-3 => L+11                                                              |
| 62 | 33072.764 | 302.364 | 2.20E-03 | 33.1% H-22 => L+1, 23.8% H-22 => LUMO, 21.5% H-23 => LUMO, 17.1% H-23 => L+1                                                           |
| 63 | 33075.184 | 302.341 | 1.70E-03 | 26.8% H-23 => L+1, 19.0% H-23 => LUMO, 17.1% H-22 => LUMO, 13.9% H-22 => L+1, 9.40% H-26 => LUMO, 6.74% H-27 => L+1                    |
| 64 | 33075.184 | 302.341 | 4.00E-04 | 38.8% H-26 => LUMO, 27.8% H-27 => L+1, 6.61% H-23 => L+1, 5.28% H-21 => L+1, 4.51% H-23 => LUMO, 4.24% H-22 => LUMO, 3.25% H-22 => L+1 |
| 65 | 33096.154 | 302.15  | 0.00E+00 | 44.7% H-26 => L+1, 39.8% H-27 => LUMO, 4.91% H-21 => LUMO, 2.48% H-22 => L+3, 2.48% H-23 => L+2                                        |
| 66 | 33185.682 | 301.335 | 3.34E-02 | 46.6% HOMO => L+10, 31.4% H-1 => L+11, 5.11% H-2 => L+8, 4.19% H-3 => L+9                                                              |
| 67 | 33196.167 | 301.24  | 2.69E-02 | 42.3% HOMO => L+11, 36.0% H-1 => L+10, 4.82% H-2 => L+9, 4.69% H-3 => L+8                                                              |
| 68 | 33222.783 | 300.998 | 2.64E-02 | 39.5% H-3 => L+4, 32.7% H-2 => L+5, 13.6% HOMO => L+6, 7.15% H-1 => L+7, 4.30% HOMO => L+9                                             |
| 69 | 33228.429 | 300.947 | 0.00E+00 | 44.8% H-2 => L+4, 29.5% H-3 => L+5, 12.5% HOMO => L+7, 7.24% H-1 => L+6, 2.88% HOMO => L+8                                             |
